# Supplementary material
Source: MDPI journal article supplement (https://www.mdpi.com/2073-4395/12/11/2839)
Supplement: s1 [file s1]

| Supplementary Table S1a: Comparison of Standard Statistics, for All Nutrients, Across Years |         |           |              |             |           |               |                |                |                |           |
|---------------------------------------------------------------------------------------------|---------|-----------|--------------|-------------|-----------|---------------|----------------|----------------|----------------|-----------|
| Trait                                                                                       |         | Boron (B) | Calcium (Ca) | Copper (Cu) | Iron (Fe) | Potassium (K) | Magnesium (Mg) | Manganese (Mn) | Phosphorus (P) | Zinc (Zn) |
| Minimum                                                                                     | 2006-07 | 0.00      | 249.14       | 1.52        | 34.76     | 3728.00       | 1279.30        | 8.09           | 2731.60        | 27.22     |
|                                                                                             | 2015-16 | 0.00      | 327.93       | 1.93        | 32.45     | 4210.60       | 1641.50        | 9.43           | 3380.10        | 32.87     |
| Maximum                                                                                     | 2006-07 | 3.10      | 766.97       | 8.42        | 91.72     | 10967.00      | 2547.80        | 25.09          | 6271.50        | 69.46     |
|                                                                                             | 2015-16 | 7.55      | 1275.00      | 7.45        | 93.72     | 10754.00      | 3013.50        | 48.04          | 9479.00        | 76.96     |
| Mean                                                                                        | 2006-07 | 0.38      | 486.60       | 4.91        | 60.15     | 6491.43       | 1695.65        | 15.35          | 4192.85        | 42.96     |
|                                                                                             | 2015-16 | 1.64      | 582.87       | 4.29        | 57.11     | 6647.68       | 2145.32        | 17.75          | 5347.83        | 49.96     |
| Median                                                                                      | 2006-07 | 0.25      | 477.15       | 4.86        | 59.23     | 6335.65       | 1655.65        | 14.92          | 4131.55        | 42.69     |
|                                                                                             | 2015-16 | 1.36      | 554.49       | 4.24        | 55.64     | 6581.25       | 2110.20        | 17.18          | 5241.50        | 48.92     |
| Range                                                                                       | 2006-07 | 3.10      | 517.83       | 6.90        | 56.97     | 7239.00       | 1268.50        | 17.00          | 3539.90        | 42.24     |
|                                                                                             | 2015-16 | 7.55      | 947.07       | 5.52        | 61.27     | 6543.40       | 1372.00        | 38.61          | 6098.90        | 44.09     |
| Standard Deviation                                                                          | 2006-07 | 0.45      | 95.35        | 1.26        | 12.00     | 1134.91       | 217.04         | 3.33           | 693.93         | 7.43      |
|                                                                                             | 2015-16 | 1.17      | 144.51       | 1.02        | 11.89     | 1106.64       | 264.36         | 4.19           | 927.89         | 8.01      |
| Standard Error                                                                              | 2006-07 | 0.03      | 6.26         | 0.08        | 0.79      | 74.51         | 14.25          | 0.22           | 45.56          | 0.49      |
|                                                                                             | 2015-16 | 0.08      | 9.49         | 0.07        | 0.78      | 72.65         | 17.36          | 0.28           | 60.92          | 0.53      |
| Skew                                                                                        | 2006-07 | 1.95      | 0.29         | 0.09        | 0.40      | 0.51          | 0.80           | 0.63           | 0.35           | 0.27      |
|                                                                                             | 2015-16 | 1.76      | 1.55         | 0.58        | 0.53      | 0.63          | 0.58           | 1.99           | 0.79           | 0.58      |

**Supplementary Table S1b: Comparison of Standard Statistics, Across Years. Data Cube Root Transformed.**

| Trait              |         | Boron (B)                                 | Calcium (Ca)                              | Copper (Cu)                               | Iron (Fe)                | Potassium (K)            | Magnesium (Mg)             | Manganese (Mn)                             | Phosphorus (P)            | Zinc (Zn)                |
|--------------------|---------|-------------------------------------------|-------------------------------------------|-------------------------------------------|--------------------------|--------------------------|----------------------------|--------------------------------------------|---------------------------|--------------------------|
| Minimum            | 2006-07 | 0.000                                     | 6.292                                     | 1.149                                     | 3.263                    | 15.506                   | 10.856                     | 2.007                                      | 13.979                    | 3.008                    |
|                    | 2015-16 | 0.000                                     | 6.896                                     | 1.245                                     | 3.190                    | 16.148                   | 11.796                     | 2.113                                      | 15.008                    | 3.203                    |
| Maximum            | 2006-07 | 1.457                                     | 9.154                                     | 2.034                                     | 4.510                    | 22.218                   | 13.658                     | 2.928                                      | 18.441                    | 4.111                    |
|                    | 2015-16 | 1.962                                     | 10.844                                    | 1.953                                     | 4.542                    | 22.073                   | 14.444                     | 3.635                                      | 21.164                    | 4.254                    |
| Mean               | 2006-07 | 0.590                                     | 7.832                                     | 1.686                                     | 3.901                    | 18.592                   | 11.904                     | 2.473                                      | 16.077                    | 3.491                    |
|                    | 2015-16 | 1.116                                     | 8.303                                     | 1.615                                     | 3.833                    | 18.747                   | 12.876                     | 2.594                                      | 17.431                    | 3.673                    |
| Median             | 2006-07 | 0.630                                     | 7.814                                     | 1.694                                     | 3.898                    | 18.504                   | 11.830                     | 2.462                                      | 16.046                    | 3.495                    |
|                    | 2015-16 | 1.107                                     | 8.215                                     | 1.619                                     | 3.818                    | 18.740                   | 12.826                     | 2.580                                      | 17.371                    | 3.657                    |
| Range              | 2006-07 | 1.457                                     | 2.861                                     | 0.885                                     | 1.246                    | 6.712                    | 2.802                      | 0.920                                      | 4.462                     | 1.103                    |
|                    | 2015-16 | 1.962                                     | 3.948                                     | 0.708                                     | 1.353                    | 5.925                    | 2.648                      | 1.523                                      | 6.156                     | 1.050                    |
| Sample Variance    | 2006-07 | 0.100                                     | 0.266                                     | 0.023                                     | 0.067                    | 1.165                    | 0.248                      | 0.031                                      | 0.785                     | 0.041                    |
|                    | 2015-16 | 0.082                                     | 0.411                                     | 0.016                                     | 0.070                    | 1.059                    | 0.272                      | 0.037                                      | 0.978                     | 0.038                    |
| Standard Deviation | 2006-07 | 0.316                                     | 0.516                                     | 0.152                                     | 0.259                    | 1.079                    | 0.498                      | 0.177                                      | 0.886                     | 0.202                    |
|                    | 2015-16 | 0.285                                     | 0.641                                     | 0.128                                     | 0.264                    | 1.029                    | 0.522                      | 0.192                                      | 0.989                     | 0.194                    |
| Standard Error     | 2006-07 | 0.021                                     | 0.034                                     | 0.010                                     | 0.017                    | 0.071                    | 0.033                      | 0.012                                      | 0.058                     | 0.013                    |
|                    | 2015-16 | 0.019                                     | 0.042                                     | 0.008                                     | 0.017                    | 0.068                    | 0.034                      | 0.013                                      | 0.065                     | 0.013                    |
| Skew               | 2006-07 | 0.101                                     | -0.041                                    | -0.586                                    | 0.082                    | 0.119                    | 0.537                      | 0.252                                      | 0.102                     | 0.002                    |
|                    | 2015-16 | -0.072                                    | 0.973                                     | 0.118                                     | 0.199                    | 0.239                    | 0.400                      | 0.795                                      | 0.391                     | 0.286                    |
| Shapiro Wilk       | 2006-07 | W = 0.899,<br>p = 2.106x10 <sup>-11</sup> | W = 0.997,<br>p = 0.946                   | W = 0.976,<br>p = 4.879x10 <sup>-04</sup> | W = 0.993,<br>p = 0.3037 | W = 0.994,<br>p = 0.5171 | W = 0.980,<br>p = 0.002605 | W = 0.990,<br>p = 0.1134                   | W = 0.992,<br>p = 0.2866  | W = 0.992,<br>p = 0.2564 |
|                    | 2015-16 | W = 0.952,<br>p = 6.147x10 <sup>-07</sup> | W = 0.949,<br>p = 2.944x10 <sup>-07</sup> | W = 0.995,<br>p = 0.6205                  | W = 0.992,<br>p = 0.2289 | W = 0.993,<br>p = 0.3591 | W = 0.981,<br>p = 0.003394 | W = 0.967,<br>p = 2.831 x10 <sup>-05</sup> | W = 0.989,<br>p = 0.06434 | W = 0.991,<br>p = 0.1611 |

| Supplementary Table S2: Analysis of Variance (ANOVA) Accession ~ Year |            |     |             |              |          |                        |              |
|-----------------------------------------------------------------------|------------|-----|-------------|--------------|----------|------------------------|--------------|
| Trait                                                                 | Source     | df  | Sum Squared | Mean Squared | F value  | Pr (>F)                | Significance |
| Boron (B)                                                             |            |     |             |              |          |                        |              |
|                                                                       | Accessions | 231 | 22.142      | 0.096        | 1.257    | 0.1844                 |              |
|                                                                       | Trials     | 1   | 31.9        | 31.9         | 374.6438 | <2.0x10 <sup>-16</sup> | ***          |
|                                                                       | Residuals  | 231 | 19.669      | 0.085        |          |                        |              |
| Calcium (Ca)                                                          |            |     |             |              |          |                        |              |
|                                                                       | Accessions | 231 | 112.628     | 0.4876       | 2.58     | 7.88E-13               | ***          |
|                                                                       | Trials     | 1   | 25.7642     | 25.7642      | 136.502  | <2.2x10 <sup>-16</sup> | ***          |
|                                                                       | Residuals  | 231 | 43.649      | 0.189        |          |                        |              |
| Copper (Cu)                                                           |            |     |             |              |          |                        |              |
|                                                                       | Accessions | 231 | 6.9917      | 0.03027      | 3.2861   | <2.2x10 <sup>-16</sup> | ***          |
|                                                                       | Trials     | 1   | 0.5914      | 0.59145      | 64.2136  | 5.51x10 <sup>-14</sup> | ***          |
|                                                                       | Residuals  | 231 | 2.1277      | 0.00921      |          |                        |              |
| Iron (Fe)                                                             |            |     |             |              |          |                        |              |
|                                                                       | Accessions | 231 | 20.8379     | 0.09021      | 1.9251   | 4.14E-07               | ***          |
|                                                                       | Trials     | 1   | 0.53564     | 0.53564      | 11.4312  | 0.0008479              |              |
|                                                                       | Residuals  | 231 | 10.8241     | 0.04686      |          |                        |              |
| Potassium (K)                                                         |            |     |             |              |          |                        |              |
|                                                                       | Accessions | 231 | 354.54      | 1.5348       | 2.2273   | 9.84E-10               | ***          |
|                                                                       | Trials     | 1   | 2.7673      | 2.7673       | 4.0157   | 0.04625                |              |
|                                                                       | Residuals  | 231 | 159.18      | 0.6891       |          |                        |              |
| Magnesium (Mg)                                                        |            |     |             |              |          |                        |              |
|                                                                       | Accessions | 231 | 80.715      | 0.349        | 2.0496   | 3.50E-08               | ***          |
|                                                                       | Trials     | 1   | 109.662     | 109.662      | 643.2576 | <2.2x10 <sup>-16</sup> | ***          |
|                                                                       | Residuals  | 231 | 39.381      | 0.17         |          |                        |              |
| Manganese (Mn)                                                        |            |     |             |              |          |                        |              |
|                                                                       | Accessions | 231 | 11.5031     | 0.0498       | 2.7489   | 2.70E-14               | ***          |
|                                                                       | Trials     | 1   | 1.71242     | 1.71242      | 95.5312  | <2.2x10 <sup>-16</sup> | ***          |
|                                                                       | Residuals  | 231 | 4.1845      | 0.01811      |          |                        |              |
| Phosphorus (P)                                                        |            |     |             |              |          |                        |              |
|                                                                       | Accessions | 231 | 246.74      | 1.068        | 1.538    | 0.000566               | ***          |
|                                                                       | Trials     | 1   | 212.911     | 212.911      | 306.564  | <2.2x10 <sup>-16</sup> | ***          |
|                                                                       | Residuals  | 231 | 160.43      | 0.695        |          |                        |              |
| Zinc (Zn)                                                             |            |     |             |              |          |                        |              |
|                                                                       | Accessions | 231 | 12.2156     | 0.0529       | 2.0635   | 2.27E-08               | ***          |
|                                                                       | Trials     | 1   | 3.8464      | 3.8464       | 150.0933 | <2.2x10 <sup>-16</sup> | ***          |
|                                                                       | Residuals  | 231 | 5.9198      | 0.0256       |          |                        |              |
| Significance Codes                                                    |            |     | *** 0.001   | ** 0.01      | * 0.05   | ! 0.1                  |              |

**Supplementary Table S3: SNPs Associated with Seed Micronutrients and Genes of Interest in that Genomic Region, Identified by GWASpoly**

| Trait | Year  | SNP           | Chr | Position  | Allele | p-value                | R <sup>2</sup> | maf   | Stable Gene ID            | IPK Descriptions                                                              |
|-------|-------|---------------|-----|-----------|--------|------------------------|----------------|-------|---------------------------|-------------------------------------------------------------------------------|
| B     | 15-16 | S3H_116597238 | 3H  | 116597238 | G/T    | 5.98x10 <sup>-06</sup> | 0.026          | 0.030 | HORVU.MOREX.r3.3HG0246670 | DUF4228 domain protein                                                        |
| B     | 15-16 | S7H_177304153 | 7H  | 177304153 | A/G    | 7.37x10 <sup>-07</sup> | 0.135          | 0.045 | HORVU.MOREX.r3.7HG0680110 | Potassium transporter                                                         |
|       |       |               |     |           |        |                        |                |       | HORVU.MOREX.r3.7HG0680120 | 3-oxoacyl-reductase                                                           |
|       |       |               |     |           |        |                        |                |       | HORVU.MOREX.r3.7HG0680130 | NAC (No Apical Meristem) domain transcriptional regulator superfamily protein |
| B     | 15-16 | S7H_180179844 | 7H  | 180179844 | C/T    | 7.68x10 <sup>-06</sup> | --             | 0.039 | None                      | N/A                                                                           |
| Ca    | 15-16 | S3H_440581824 | 3H  | 440581824 | A/C    | 5.90x10 <sup>-06</sup> | 0.040          | 0.228 | None                      | N/A                                                                           |
| Ca    | 15-16 | S3H_610176767 | 3H  | 610176767 | G/T    | 4.67x10 <sup>-06</sup> | 0.023          | 0.069 | HORVU.MOREX.r3.3HG0326120 | Glutathione S-transferase T3                                                  |
|       |       |               |     |           |        |                        |                |       | HORVU.MOREX.r3.3HG0326130 | FBD-associated F-box protein                                                  |
|       |       |               |     |           |        |                        |                |       | HORVU.MOREX.r3.3HG0326140 | FBD-associated F-box protein                                                  |
|       |       |               |     |           |        |                        |                |       | HORVU.MOREX.r3.3HG0326160 | F-box protein-like protein                                                    |
|       |       |               |     |           |        |                        |                |       | HORVU.MOREX.r3.3HG0326170 | Nuclear transport factor 2 (NTF2) family protein                              |
|       |       |               |     |           |        |                        |                |       | HORVU.MOREX.r3.3HG0326190 | ABC transporter ATP-binding protein                                           |
|       |       |               |     |           |        |                        |                |       | HORVU.MOREX.r3.3HG0326200 | Cofactor assembly                                                             |
|       |       |               |     |           |        |                        |                |       | HORVU.MOREX.r3.3HG0326210 | Mitochondrial-processing peptidase subunit alpha                              |
|       |       |               |     |           |        |                        |                |       | HORVU.MOREX.r3.3HG0326220 | Leucine-rich repeat-containing protein 1                                      |
|       |       |               |     |           |        |                        |                |       | HORVU.MOREX.r3.3HG0326230 | Vacuolar protein sorting 55 containing protein                                |
| Ca    | 15-16 | S5H_439603234 | 5H  | 439603234 | A/G    | 1.52x10 <sup>-05</sup> | 0.011          | 0.101 | HORVU.MOREX.r3.5HG0481890 | Early light-induced protein                                                   |
|       |       |               |     |           |        |                        |                |       | HORVU.MOREX.r3.5HG0481900 | Early light-induced protein                                                   |
|       |       |               |     |           |        |                        |                |       | HORVU.MOREX.r3.5HG0481920 | Early light-induced protein                                                   |
|       |       |               |     |           |        |                        |                |       | HORVU.MOREX.r3.5HG0481930 | cyclin-dependent kinase inhibitor SMR2-like protein                           |
|       |       |               |     |           |        |                        |                |       | HORVU.MOREX.r3.5HG0481940 | S-adenosylmethionine-dependent methyltransferase, putative                    |
| Cu    | 06-07 | S3H_11066728  | 3H  | 11066728  | C/T    | 1.12x10 <sup>-08</sup> | 0.053          | 0.127 | HORVU.MOREX.r3.3HG0224020 | BED zinc finger,hAT family dimerization domain                                |
| Cu    | 06-07 | S3H_11068225  | 3H  | 11068225  | A/C    | 3.25x10 <sup>-07</sup> | --             | 0.125 | HORVU.MOREX.r3.3HG0224040 | Pentatricopeptide repeat-containing protein                                   |
| Cu    | 06-07 | S3H_585247556 | 3H  | 585247556 | C/G    | 1.36x10 <sup>-06</sup> | 0.000          | 0.056 | HORVU.MOREX.r3.3HG0314200 | Early nodulin-like protein 1                                                  |
|       |       |               |     |           |        |                        |                |       | HORVU.MOREX.r3.3HG0314210 | 2-oxoglutarate (2OG) and Fe(II)-dependent oxygenase superfamily protein       |

|    |                |               |    |           |     |                            |       |       |                           |                                                                            |
|----|----------------|---------------|----|-----------|-----|----------------------------|-------|-------|---------------------------|----------------------------------------------------------------------------|
|    |                |               |    |           |     |                            |       |       | HORVU.MOREX.r3.3HG0314220 | Histone-lysine N-methyltransferase                                         |
| Fe | 06-07          | S5H_74074539  | 5H | 74074539  | A/G | $1.61 \times 10^{-05}$     | --    | 0.494 | HORVU.MOREX.r3.5HG0439690 | F-box protein                                                              |
| Fe | 06-07          | S5H_76074047  | 5H | 76074047  | C/T | $1.48 \times 10^{-06}$     | 0.059 | 0.500 | HORVU.MOREX.r3.5HG0439860 | Disease resistance protein RPM1                                            |
|    |                |               |    |           |     |                            |       |       | HORVU.MOREX.r3.5HG0439870 | Dicer-like 3                                                               |
| Fe | 06-07          | S7H_630244607 | 7H | 630244607 | A/G | $7.67 \times 10^{-06}$     | 0.013 | 0.332 | HORVU.MOREX.r3.7HG0752330 | 2-oxoglutarate (2OG) and Fe(II)-dependent oxygenase superfamily protein    |
|    |                |               |    |           |     |                            |       |       | HORVU.MOREX.r3.7HG0752340 | 2-oxoglutarate (2OG) and Fe(II)-dependent oxygenase superfamily protein    |
|    |                |               |    |           |     |                            |       |       | HORVU.MOREX.r3.7HG0752350 | AT hook motif DNA-binding family protein                                   |
| K  | 15-16          | S2H_20020739  | 2H | 20020739  | A/G | $5.47 \times 10^{-06}$     | 0.040 | 0.347 | HORVU.MOREX.r3.2HG0105270 | UPF0307 protein                                                            |
|    |                |               |    |           |     |                            |       |       | HORVU.MOREX.r3.2HG0105290 | Telomere repeat-binding factor like-protein                                |
| Mg | 15-16          | S2H_647484280 | 2H | 647484280 | A/T | $1.15 \times 10^{-05}$     | 0.162 | 0.200 | HORVU.MOREX.r3.2HG0210270 | Dihydroorotate dehydrogenase (Quinone)                                     |
|    |                |               |    |           |     |                            |       |       | HORVU.MOREX.r3.2HG0210280 | Pentatricopeptide repeat-containing protein                                |
|    |                |               |    |           |     |                            |       |       | HORVU.MOREX.r3.2HG0210290 | Thioredoxin                                                                |
|    |                |               |    |           |     |                            |       |       | HORVU.MOREX.r3.2HG0210300 | disease resistance family protein / LRR family protein                     |
| Mg | 15-16          | S6H_59682630  | 6H | 59682630  | C/T | $8.58 \times 10^{-06}$     | 0.241 | 0.026 | HORVU.MOREX.r3.6HG0558640 | 26S proteasome non-ATPase regulatory subunit-like protein                  |
| Mg | 15-16          | S6H_59682682  | 6H | 59682682  | A/G | $8.58 \times 10^{-06}$     | --    | 0.026 | HORVU.MOREX.r3.6HG0558690 | Polynucleotide 5'-hydroxyl-kinase NOL9                                     |
| Mn | 06-07          | S1H_437852428 | 1H | 437852428 | C/G | $1.23 \times 10^{-05}$     | 0.006 | 0.037 | HORVU.MOREX.r3.1HG0067260 | NB-ARC domain-containing disease resistance protein                        |
|    |                |               |    |           |     |                            |       |       | HORVU.MOREX.r3.1HG0067270 | H/ACA ribonucleoprotein complex non-core subunit NAF1                      |
| Mn | 15-16          | S5H_569184852 | 5H | 569184852 | A/T | $3.87 \times 10^{-06}$     | 0.147 | 0.108 | HORVU.MOREX.r3.5HG0529130 | Elongation factor                                                          |
|    |                |               |    |           |     |                            |       |       | HORVU.MOREX.r3.5HG0529140 | Elongation factor                                                          |
|    |                |               |    |           |     |                            |       |       | HORVU.MOREX.r3.5HG0529160 | LINE-1 reverse transcriptase                                               |
|    |                |               |    |           |     |                            |       |       | HORVU.MOREX.r3.5HG0529170 | F-box domain containing protein                                            |
|    |                |               |    |           |     |                            |       |       | HORVU.MOREX.r3.5HG0529180 | Huntingtin interacting protein K                                           |
| Mn | 15-16          | S7H_24895773  | 7H | 24895773  | A/G | $1.11 \times 10^{-05}$     | 0.131 | 0.108 | HORVU.MOREX.r3.7HG0647710 | Pentatricopeptide repeat-containing protein                                |
|    |                |               |    |           |     |                            |       |       | HORVU.MOREX.r3.7HG0647750 | Werner Syndrome-like exonuclease                                           |
|    |                |               |    |           |     |                            |       |       | HORVU.MOREX.r3.7HG0647760 | F-box family protein                                                       |
| Cu | 06-07<br>15-16 | S7H_123030780 | 7H | 123030780 | C/T | $\leq 3.1 \times 10^{-04}$ | --    | 0.500 | HORVU.MOREX.r3.7HG0671730 | Kanadaplin                                                                 |
|    |                |               |    |           |     |                            |       |       | HORVU.MOREX.r3.7HG0671750 | RNA-directed DNA polymerase (reverse transcriptase)-related family protein |
