# Supplementary material
Source: MDPI journal article supplement (https://www.mdpi.com/2073-4395/12/11/2839)

Supplemental FigureS1: Histograms and Box Plots of Untransformed Phenotypic Data

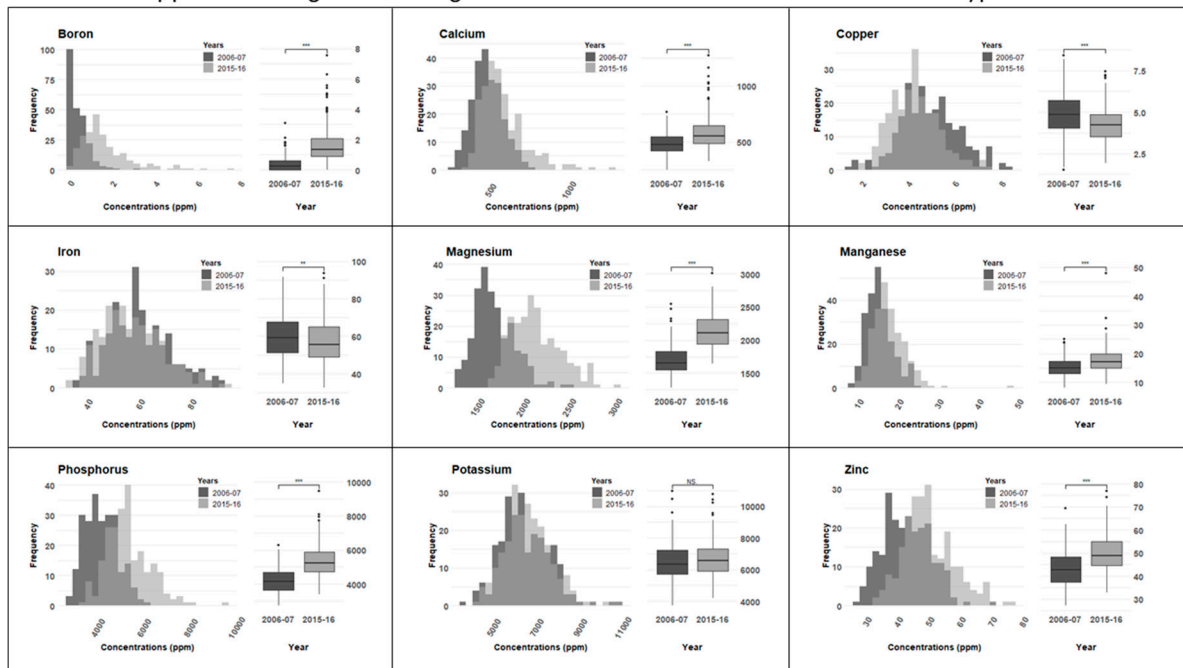

Supplemental FigureS2: GWASpoly Manhattan plots

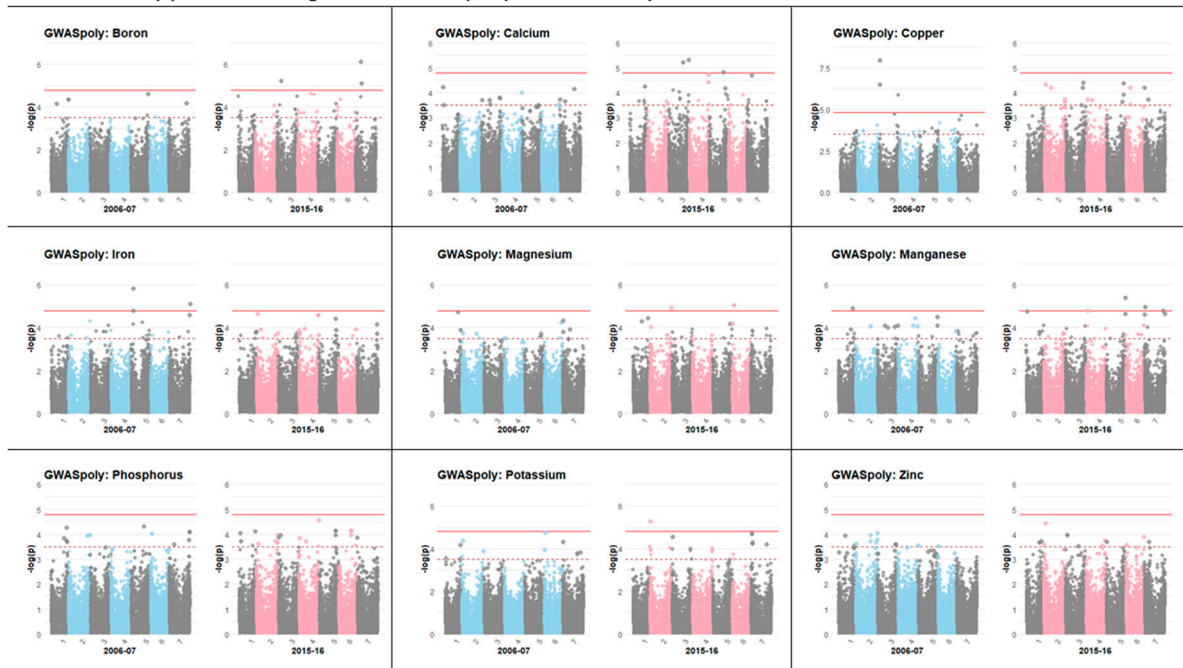

Supplement: s1 [file s1]
